# Supplementary material
Source: publisher figshare collection journal article supplement (https://acs.figshare.com/ndownloader/files/5333161)
Supplement: Supplementary file 1 [file 5333161]

# **Lanthanide Coordination Polymer Nanoparticles as an Excellent Artificial Peroxidase for Hydrogen Peroxide Detection**

Hui-Hui Zeng,<sup>1,2</sup> Wei-Bin Qiu,<sup>1</sup> Li Zhang,<sup>1</sup> Ru-Ping Liang,<sup>1</sup> Jian-Ding Qiu<sup>1,2\*</sup>

Department of Chemistry, Nanchang University, Nanchang 330031, China

Department of Materials and Chemical Engineering, Pingxiang University, Pingxiang 337055, China

\* Tel. Fax: +86 791 83969518. E-mail: jdqiu@ncu.edu.cn

## **TABLE OF CONTENTS**

1. PL spectra of NTP-Ce-Tris CPNs (NTP = ATP, GTP, CTP, TTP, and UTP) (Figure S1)
2. Studies on optimum synthesis conditions of ATP-Ce-Tris CPNs (Figure S2)
3. UV-vis absorption spectra of cerium nitrate, ATP, Tris-HCl, Tris-Ce, ATP-Tris, ATP-Ce, ATP-Ce-Tris (Figure S3)
4. PL spectra of the cerium nitrate, Tris-Ce, ATP-Ce upon H<sub>2</sub>O<sub>2</sub> (Figure S4)
5. UV-vis absorption spectra of Ce(NO<sub>3</sub>)<sub>3</sub>, ATP-Ce, and Tris-Ce upon H<sub>2</sub>O<sub>2</sub> (Figure S5)
6. Studies on optimal ATP-Ce-Tris CPNs concentration for H<sub>2</sub>O<sub>2</sub> detection (Figure S6)
7. Reaction time study (Figure S7)
8. Studies on Effect of pH upon H<sub>2</sub>O<sub>2</sub> detection (Figure S8)
9. Selectivity study (Figure S9)
10. Studies on glucose detection from real blood samples (Table S1)
11. The method of determining detection limit (LOD)

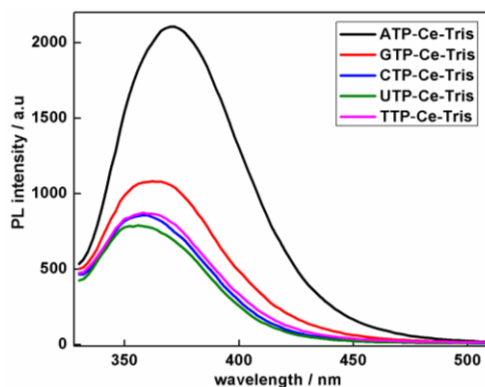

Figure S1 PL spectra of the ATP-Ce-Tris CPNs (black line), GTP-Ce-Tris CPNs (red line), CTP-Ce-Tris CPNs (blue line), UTP-Ce-Tris CPNs (green line) and TTP-Ce-Tris CPNs (pink line) in Tris-HCl buffer (50 mM, pH 7.4),  $\lambda_{\text{ex}} = 310$  nm. The concentrations of ATP-Ce-Tris, GTP-Ce-Tris, CTP-Ce-Tris, UTP-Ce-Tris, TTP-Ce-Tris CPNs were 0.4 mM.

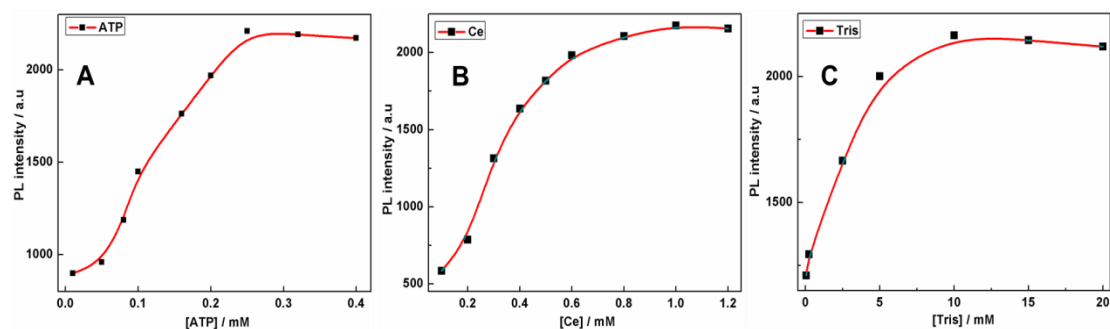

Figure S2 Dependence of the PL intensity of ATP-Ce-Tris CPNs on the concentrations of (A) ATP, (B) Ce, and (C) Tris.

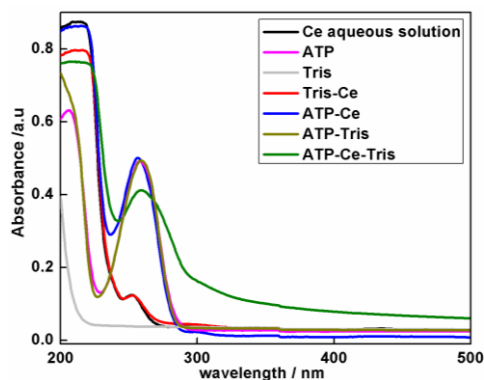

Figure S3 UV-vis absorption spectra of the cerium nitrate aqueous solution (black line), ATP aqueous solution (pink line), Tris-HCl aqueous solution (gray line), Tris-Ce aqueous solution (red line), ATP-Ce aqueous solution (blue line), ATP-Tris aqueous solution (light green line), ATP-Ce-Tris aqueous solution (green line). The concentrations of cerium nitrate, Tris-Ce, ATP-Ce, ATP-Ce-Tris CPNs were 0.4 mM.

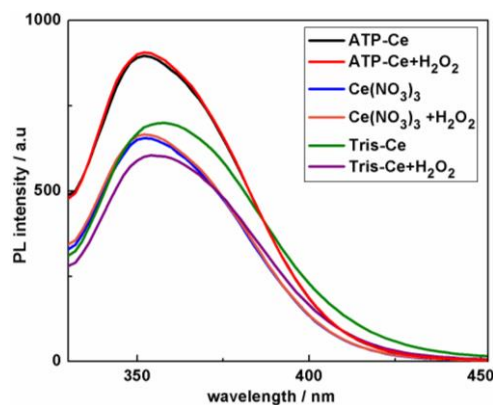

Figure S4 PL spectra of the ATP-Ce aqueous solution (black and red line),  $\text{Ce}(\text{NO}_3)_3$  (blue and orange line), Tris-Ce aqueous solution (green and purple line) in the absence and presence of  $\text{H}_2\text{O}_2$  (10  $\mu\text{M}$ ) in Tris-HCl buffer (50 mM, pH 7.4),  $\lambda_{\text{ex}} = 310$  nm. The concentrations of cerium nitrate, Tris-Ce, ATP-Ce were 0.4 mM.

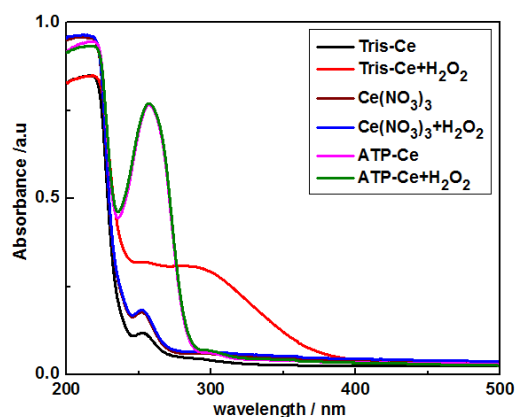

Figure S5 UV-vis absorption spectra of the Tris-Ce aqueous solution (black and red line),  $\text{Ce}(\text{NO}_3)_3$  (purple and blue line), ATP-Ce aqueous solution (pink and green line) in the absence and presence of  $\text{H}_2\text{O}_2$  (1 mM). The concentrations of Tris-Ce,  $\text{Ce}(\text{NO}_3)_3$ , ATP-Ce were 0.4 mM.

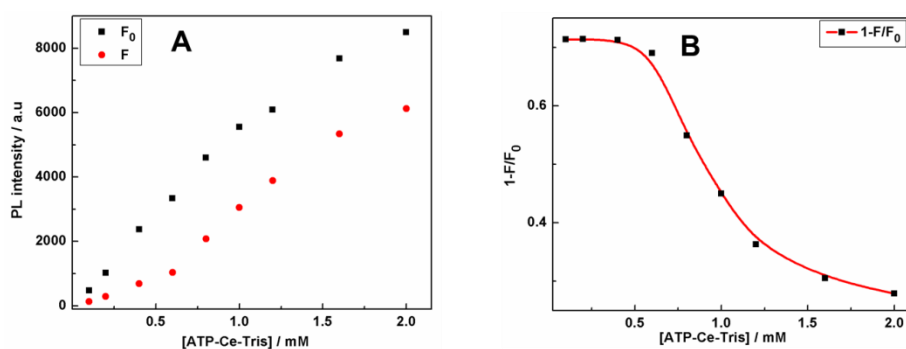

Figure S6 (A) The PL intensity of ATP-Ce-Tris CPNs with different concentration before ( $F_0$ ) and after ( $F$ ) adding  $\text{H}_2\text{O}_2$  (10  $\mu\text{M}$ ). (B) The FL quenching efficiency ( $1-F/F_0$ ) of different concentrations of ATP-Ce-Tris CPNs upon  $\text{H}_2\text{O}_2$  (10  $\mu\text{M}$ ).

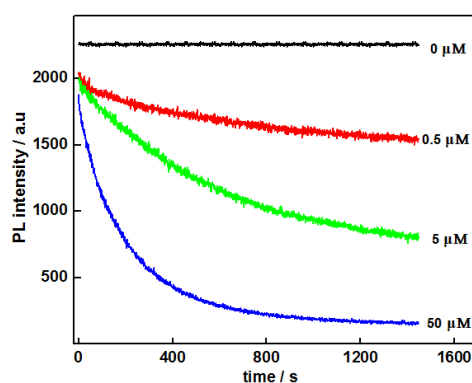

Figure S7 Time-dependent PL responses of ATP-Ce-Tris CPNs (0.4 mM) upon addition of different concentrations of  $\text{H}_2\text{O}_2$ , 0  $\mu\text{M}$  (black line), 0.5  $\mu\text{M}$  (red line), 5  $\mu\text{M}$  (green line), 50  $\mu\text{M}$  (blue line).

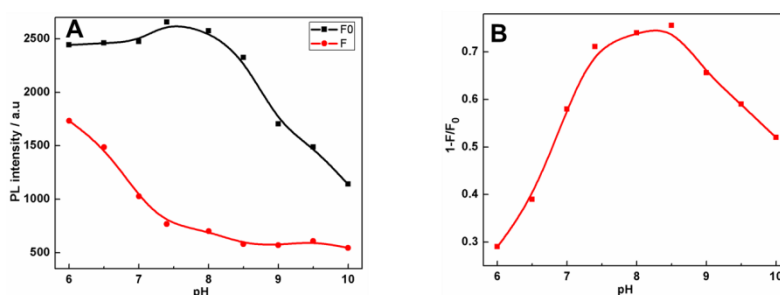

Figure S8 (A) Effect of pH on the PL intensity of ATP-Ce-Tris CPNs (0.4 mM) in the absence (black dot) and presence (red dot) of  $\text{H}_2\text{O}_2$  (10  $\mu\text{M}$ ). (B) The fluorescence quenching efficiency ( $1-F/F_0$ ) of ATP-Ce-Tris CPNs toward  $\text{H}_2\text{O}_2$ , where  $F_0$  and  $F$  are the PL intensities of ATP-Ce-Tris CPNs at 370 nm before and after adding  $\text{H}_2\text{O}_2$ , respectively.

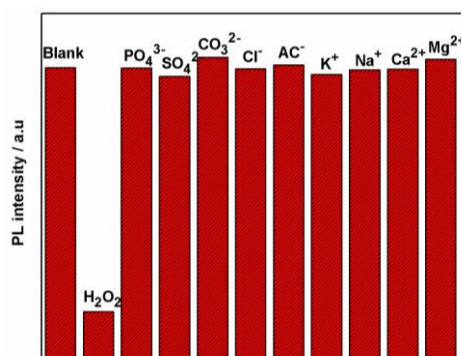

Figure S9 Selectivity competition experiments for ATP-Ce-Tris CPNs (0.4 mM) toward different interferences in Tris-HCl buffer (50 mM, pH 7.4).  $\text{H}_2\text{O}_2$  was at a concentration of 5  $\mu\text{M}$ ; other control substances are at a concentration of 0.1 mM.

**Table S1.** Results for detection of glucose from real blood samples

| Samples | Added (mM) | Detected (mean, mM) | RSD (n=3, %) | Recovery (%) |
|---------|------------|---------------------|--------------|--------------|
| 1       | 0          | 4.92                | 2.3          |              |
| 2       | 1          | 5.98                | 3.1          | 106          |
| 3       | 2          | 6.89                | 1.9          | 98.5         |
| 4       | 3          | 8.03                | 3.0          | 103.7        |

Serum samples were diluted 100-folds. Mean value of three determinations. The detection concentration is 4.90 mM by the local hospital.

The method of determining detection limit (LOD):

In this work, the LOD is calculated by using the following formula (1):<sup>1-3</sup>

$$\text{LOD}=3\sigma/\text{S} \quad (1)$$

Where ‘S’ is the slope of calibration curve, and ‘ $\sigma$ ’ is the standard deviation of 11 blank samples, which is calculated by using the following formula (2):

$$\sigma = \sqrt{\frac{1}{n-1} \sum_{i=1}^n (l_i - \bar{L})^2} \quad (2)$$

Where ‘ $l_i$ ’ is the PL intensity of each blank sample ( $i=1-11$ ), and ‘ $\bar{L}$ ’ is the average PL intensity of 11 blank samples ( $n=11$ ).

For example, in the calculation of LOD of glucose detection, ‘S’ is 0.46, which is achieved from the calibration curve equation, and the ‘ $\sigma$ ’ is about 1%, which is obtained by the standard deviation of 11 blank samples. By using formula (1), the LOD of glucose detection can be calculated and equal 65 nM.

## References:

- (1) Derayea, S. M. *Anal. Methods* **2014**, 6, 2270-2275.
- (2) Wee, S. S.; Ng, Y. H.; Ng, S. M. *Talanta* **2013**, 116, 71-76.
- (3) Liu, Z.; He, W.; Pei, M.; Zhang, G. *Chem. Commun.* **2015**, 51, 14227-14230.
